# Supplementary material
Source: publisher figshare collection journal article supplement (https://gsajournals.figshare.com/ndownloader/files/15255122)
Supplement: Supplementary file 1 [file 15255122]

Table S4: Measurements of phenotypic traits in wild type, single and double mutants and transgenic lines

| Line |  | Rosette width (cm) | Leaf length (cm) | Leaf width (cm) | Length:width ratio | Inflorescence stem height | Days to flowering |
| --- | --- | --- | --- | --- | --- | --- | --- |
| WT | Mean | 9.47 | 5.38 | 1.60 | 3.39 | 47.71 | 48.15 |
|  | SE | 0.13 | 0.11 | 0.05 | 0.09 | 0.47 | 0.44 |
| *abcb19* | Mean | 6.39 | 3.99 | 1.60 | 2.51 | 42.83 | 52.81 |
|  | SE | 0.22 | 0.10 | 0.05 | 0.06 | 0.80 | 1.86 |
| *abcb1* | Mean | 7.69 | 4.47 | 1.48 | 3.06 | 42.12 | 48.08 |
|  | SE | 0.18 | 0.09 | 0.04 | 0.10 | 0.78 | 0.50 |
| *abcb1/19* | Mean | 3.53 | 2.66 | 2.06 | 1.30 | 21.17 | 62.04 |
|  | SE | 0.06 | 0.10 | 0.07 | 0.05 | 0.70 | 1.09 |
| D2 | Mean | 6.31 | 4.32 | 1.77 | 2.45 | 42.31 | 49.40 |
|  | SE | 0.14 | 0.11 | 0.05 | 0.05 | 0.56 | 0.60 |
| D2_AtTail | Mean | 4.97 | 3.69 | 1.58 | 2.46 | 32.20 | 54.21 |
|  | SE | 0.09 | 0.11 | 0.09 | 0.20 | 0.63 | 0.72 |
| d2 | Mean | 3.24 | 2.24 | 1.71 | 1.34 | 20.76 | 66.37 |
|  | SE | 0.08 | 0.07 | 0.08 | 0.05 | 0.62 | 0.78 |
| d2_AtTail | Mean | 3.14 | 2.20 | 1.81 | 1.22 | 20.42 | 68.57 |
|  | SE | 0.06 | 0.05 | 0.04 | 0.02 | 0.46 | 0.86 |
| AtCDNA | Mean | 8.24 | 4.56 | 1.76 | 2.61 | 37.29 | 48.96 |
|  | SE | 0.12 | 0.11 | 0.06 | 0.06 | 0.63 | 0.83 |
